# Supplementary material for: Methanol Adsorption and Reaction on Samaria Thin Films on Pt(111)
Source: MDPI journal article supplement (doi:10.3390/ma8095302), 2015-09-17
Supplement: s1 [file s1]

## Supplementary Information

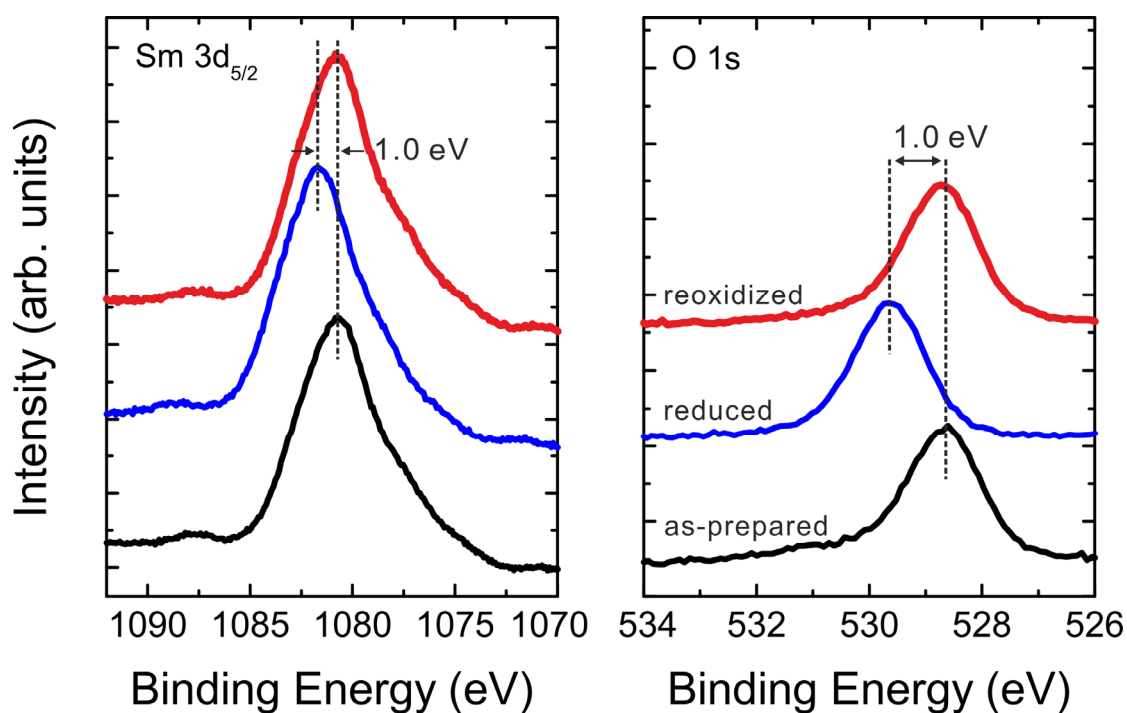

**Figure S1.** XPS spectra of Sm 3d<sub>5/2</sub> and O 1s regions collected from the 2.8 ML as-prepared, reduced, and reoxidized SmO<sub>x</sub> thin films.

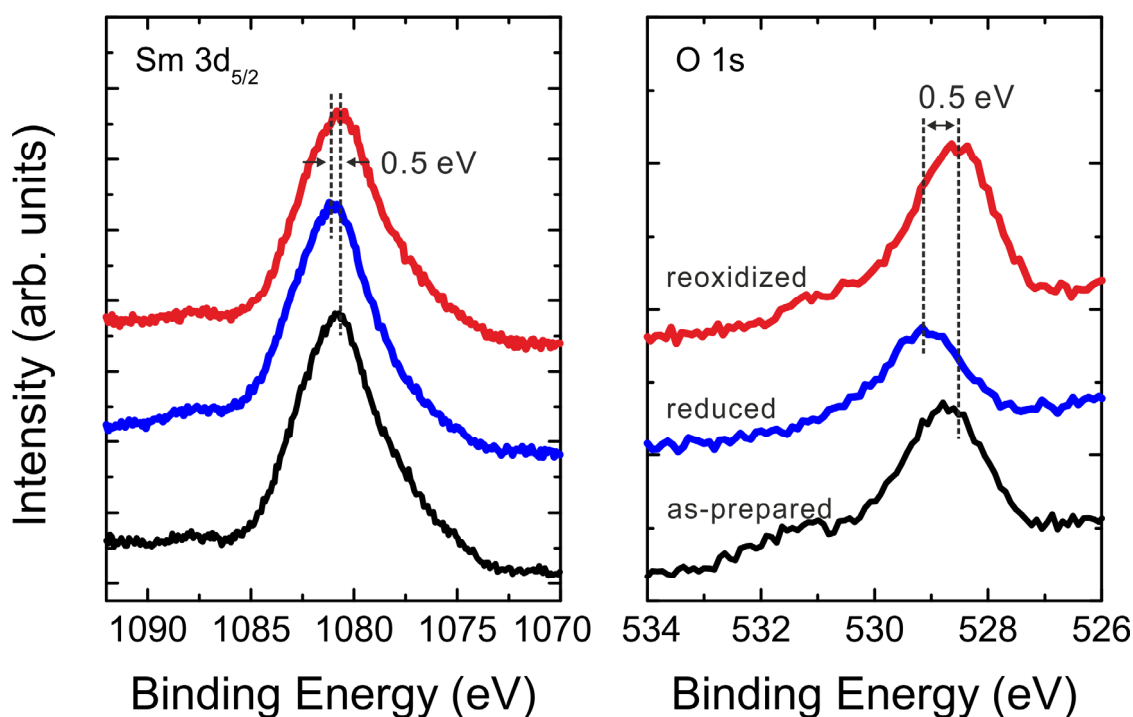

**Figure S2.** XPS spectra of Sm 3d<sub>5/2</sub> and O 1s regions collected from the 0.9 ML as-prepared, reduced, and reoxidized SmO<sub>x</sub> thin films.

Schematic representation of LEED patterns

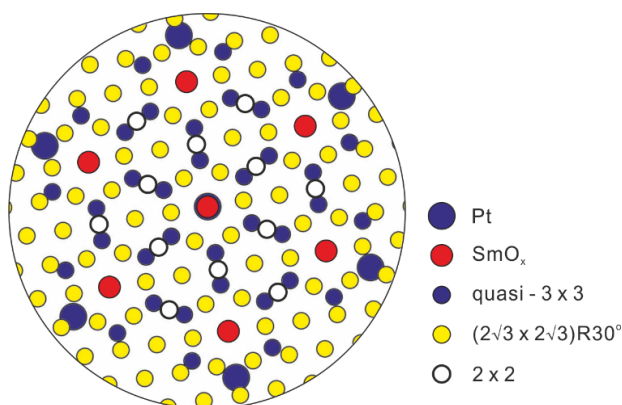**Figure S3.** Summary of LEED patterns observed.**Table S1.** Summary of LEED patterns observed for the differently prepared  $\text{SmO}_x$  deposits.

| MeOH TPD  |                                     | LEED Patterns of 0.9 ML $\text{SmO}_x$ on Pt(111) |                                                                                     |  |
|-----------|-------------------------------------|---------------------------------------------------|-------------------------------------------------------------------------------------|--|
| Treatment | as-prepared $\text{Sm}_2\text{O}_3$ | reduced $\text{SmO}_x$                            | reoxidized $\text{Sm}_2\text{O}_3$                                                  |  |
| w/o       | quasi- $3 \times 3$                 | satellites                                        | quasi- $3 \times 3 + 2$ add. spots                                                  |  |
| with      | slightly rotated                    | rotated                                           | quasi- $3 \times 3 + 2$ add. spots + $(2\sqrt{3} \times 2\sqrt{3})\text{R}30^\circ$ |  |

  

| MeOH TPD  |                                     | LEED Patterns of 2.8 ML $\text{SmO}_x$ on Pt(111)                  |                                                                    |  |
|-----------|-------------------------------------|--------------------------------------------------------------------|--------------------------------------------------------------------|--|
| Treatment | as-prepared $\text{Sm}_2\text{O}_3$ | reduced $\text{SmO}_x$                                             | reoxidized $\text{Sm}_2\text{O}_3$                                 |  |
| w/o       | quasi- $3 \times 3$                 | quasi- $3 \times 3 + (2\sqrt{3} \times 2\sqrt{3})\text{R}30^\circ$ | quasi- $3 \times 3 + 2 \times 2$                                   |  |
| with      | $\text{SmO}_x(1 \times 1)$          | quasi- $3 \times 3 + (2\sqrt{3} \times 2\sqrt{3})\text{R}30^\circ$ | quasi- $3 \times 3 + (2\sqrt{3} \times 2\sqrt{3})\text{R}30^\circ$ |  |

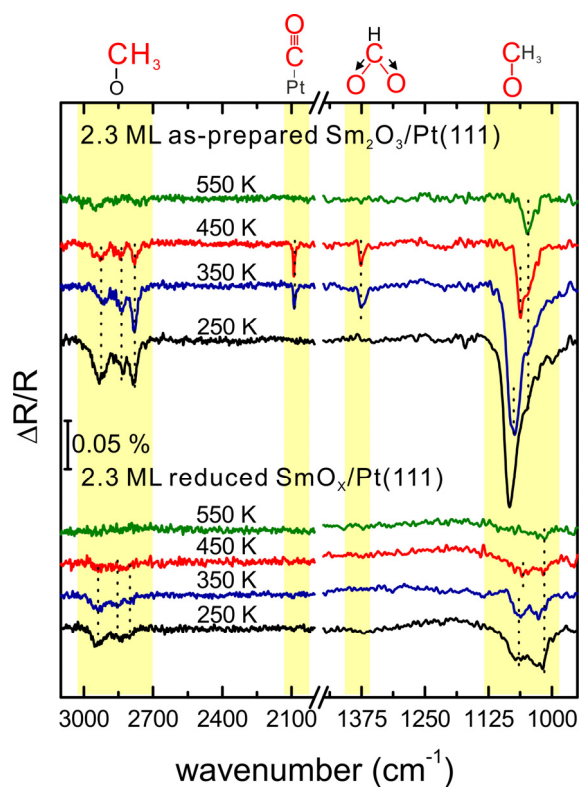**Figure S4.** Temperature-dependent IRRAS spectra collected from the 2.3 ML as-prepared and reduced  $\text{SmO}_x$  thin films.
